# Supplementary material for: Electrospun collagen/hyaluronic acid dressing co-loaded with EGF and bFGF for enhanced diabetic wound healing
Source: Royal Society of Chemistry journal article supplement (doi:10.1039/d5ra09378c), 2026-06-02
Supplement: d5ra09378c2.pdf [file d5ra09378c2.pdf]

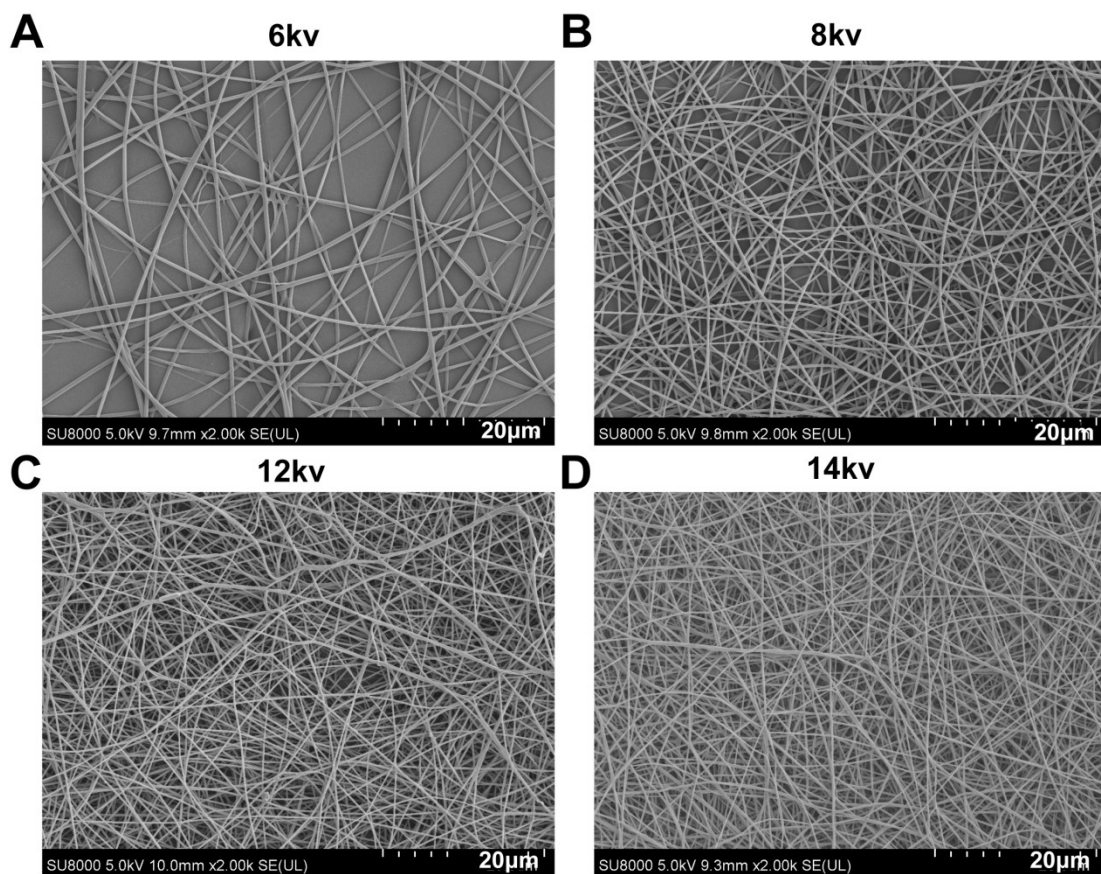

Fig. S1 SEM observation of the effect of spinning voltage on fiber formation at (A) 6 kV (B) 8 kV, (C) 12 kV, and (D) 14 kV.

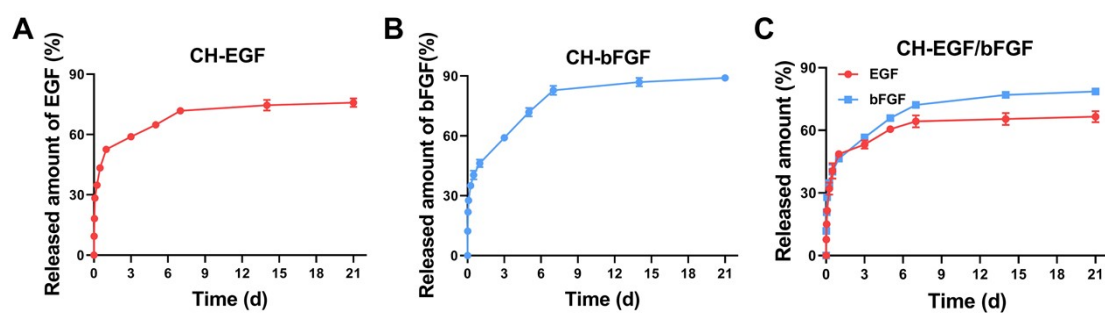

Fig. S2 The release rates of bFGF and EGF from CH-EGF/bFGF over 21 days were measured using ELISA . n=3.
